# Supplementary material
Source: ML conference proceedings conference paper supplement (https://aclanthology.org/2020.findings-emnlp.114)
Supplement: OptionalSupplementaryMaterial [file 2020.findings-emnlp.114.OptionalSupplementaryMaterial.zip]

## A Implementation Details

Our models are implemented in *PyTorch* (Paszke et al., 2019). Hyper-parameters are found by grid search within search range listed in Table 4. The hyper-parameters of the best performing model are summarized in 5. All experiments are conducted on a 12-CPU machine running CentOS Linux 7 (Core) and NVIDIA RTX 2080 with CUDA 10.1. The average runtime for an epoch is 20 minutes.

During preprocessing, SciBERT tokenizer is used to tokenize each sentence in GE'11. Meanwhile, the mapping from each word's position to its head token position is recorded. We feed each sentence in GE'11 to MetaMap to identify all the biomedical concepts in each sentence. Each recognized concept is aligned with corresponding head token with the mapping from the previous step.

To pre-train KGE, we leverage the TransE implementation from OpenKE (Han et al., 2018). All tuples associated with the selected nodes described in Section 3.1 are used for pre-training with margin loss and negative sampling,

$$\mathcal{L} = \sum_{(h,\ell,t) \in S} \sum_{(h',\ell,t') \notin S} \max(0, d(h,\ell,t) - d(h',\ell,t') + \gamma)$$

where  $\gamma$  denotes margin, and  $d(x, x')$  denotes the  $\ell - 1$  distance between  $x$  and  $x'$ .  $h$  and  $t$  are embeddings of head and tail entities from the gold training sets  $S$  with relation  $\ell$ .  $(h', \ell, t')$  denotes a corrupted tuple with either the head or tail entity replaced by a random entity. TransE is optimized using Adam (Kingma and Ba, 2015) with hyper-parameters illustrated in Table 6. Every 50 epochs, the model checkpoint is saved if the mean reciprocal rank on the development set improve from the last checkpoint; otherwise, training will be stopped.

## B Dataset

The statistics of GE'11 is shown in 7. The corpus contains 14496 events with 37.2% containing nested structure (Björne and Salakoski, 2011).<sup>6</sup> We use the official dataset split for all the results reported.

<sup>6</sup>The dataset can be downloaded from <http://bionlp-st.dbcls.jp/GE/2011/downloads/>.

| Hyper-parameter   | Range                                                      |
|-------------------|------------------------------------------------------------|
| Relation MLP dim. | {300, 500, 700, 1000}                                      |
| Trigger MLP dim.  | {300, 500, 700, 1000}                                      |
| Learning rate     | $\{1 \times 10^{-5}, 3 \times 10^{-5}, 5 \times 10^{-5}\}$ |

Table 4: Hyper-parameter search range for fine-tuning SciBERT.

| Hyper-parameter   | Value              |
|-------------------|--------------------|
| Relation MLP dim. | 300                |
| Trigger MLP dim.  | 300                |
| Learning rate     | $3 \times 10^{-5}$ |
| GEANet node dim.  | 300                |
| GEANet edge dim.  | 300                |
| GEANet layers     | 2                  |
| Dropout rate      | 0.2                |

Table 5: Hyper-parameters of the best performing GEANet-SciBERT model.

| Hyper-parameter                    | Value |
|------------------------------------|-------|
| Learning rate                      | 0.5   |
| Margin                             | 3     |
| Batch size                         | 128   |
| # corrupted tuples / # gold tuples | 25    |
| # Epochs                           | 500   |

Table 6: Hyper-parameters for pre-training KGE.

| Metric               | Number |
|----------------------|--------|
| events               | 14496  |
| sentences            | 11581  |
| nested events        | 37.2%  |
| intersentence events | 6.0%   |

Table 7: GE'11 dataset statistics
